# Supplementary material
Source: PubMed Central journal article supplement (PMC8685736)

Comparison of weekly positive tests between 2019 and 2020 for Adenovirus, non-COVID-19 Coronaviruses, Metapneumovirus, Rhinovirus and Enterovirus, Influenza, Parainfluenza, and RSV are shown. The Asterisk denotes when restrictions were begun

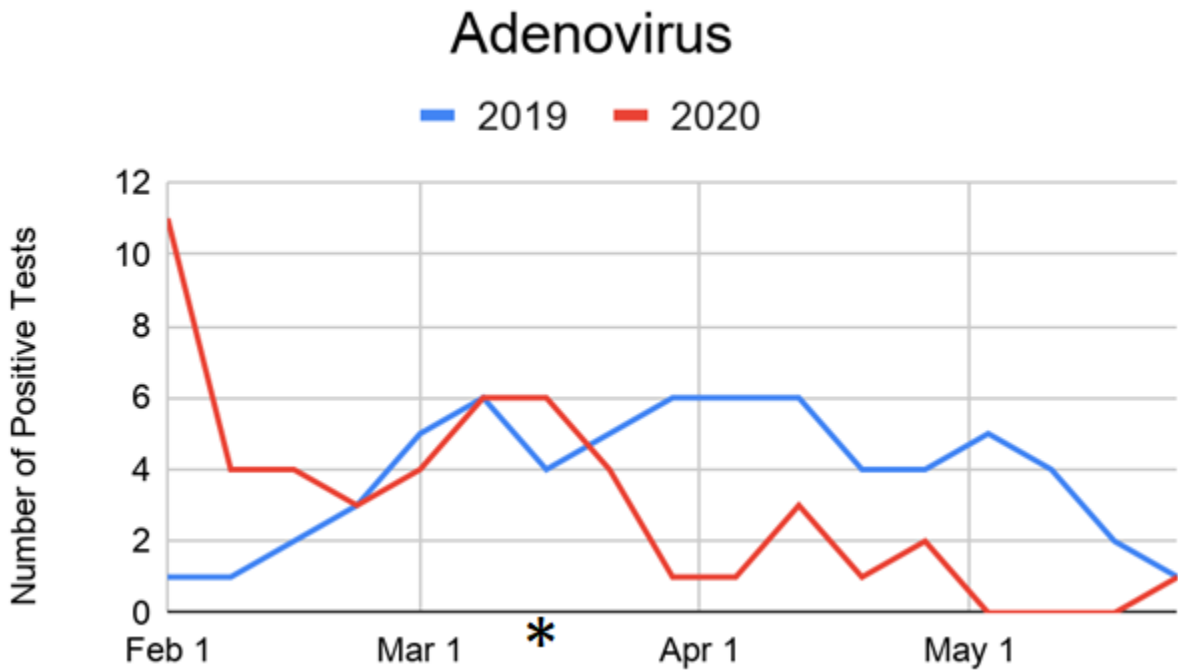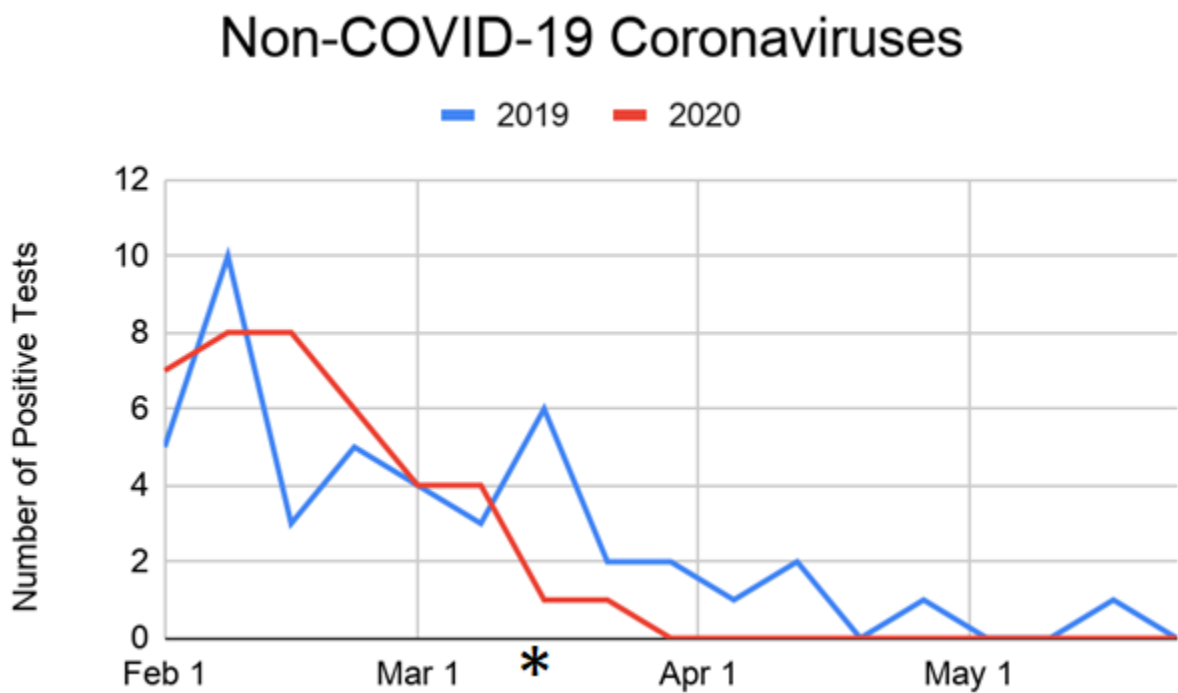

# Metapneumovirus

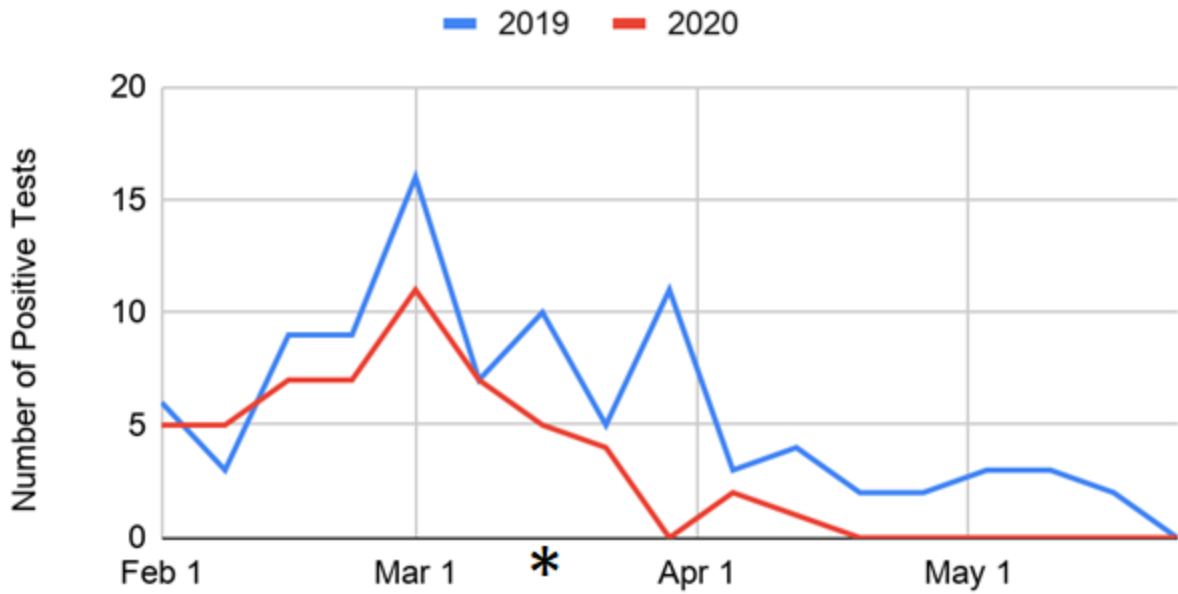

# Rhinovirus & Enterovirus

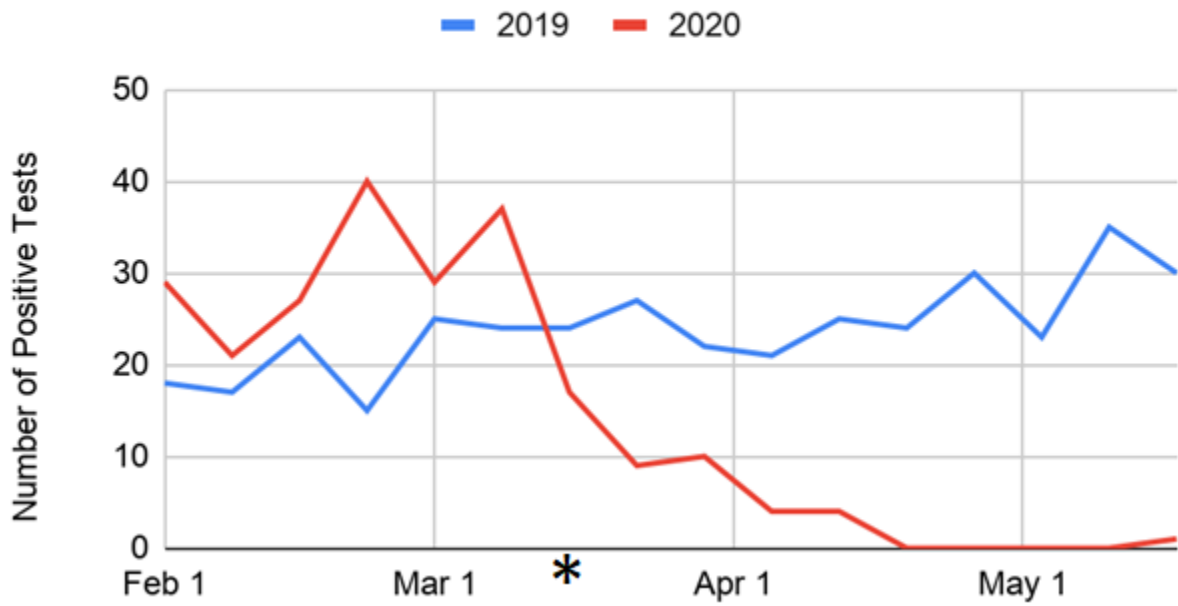

# Influenza A & B

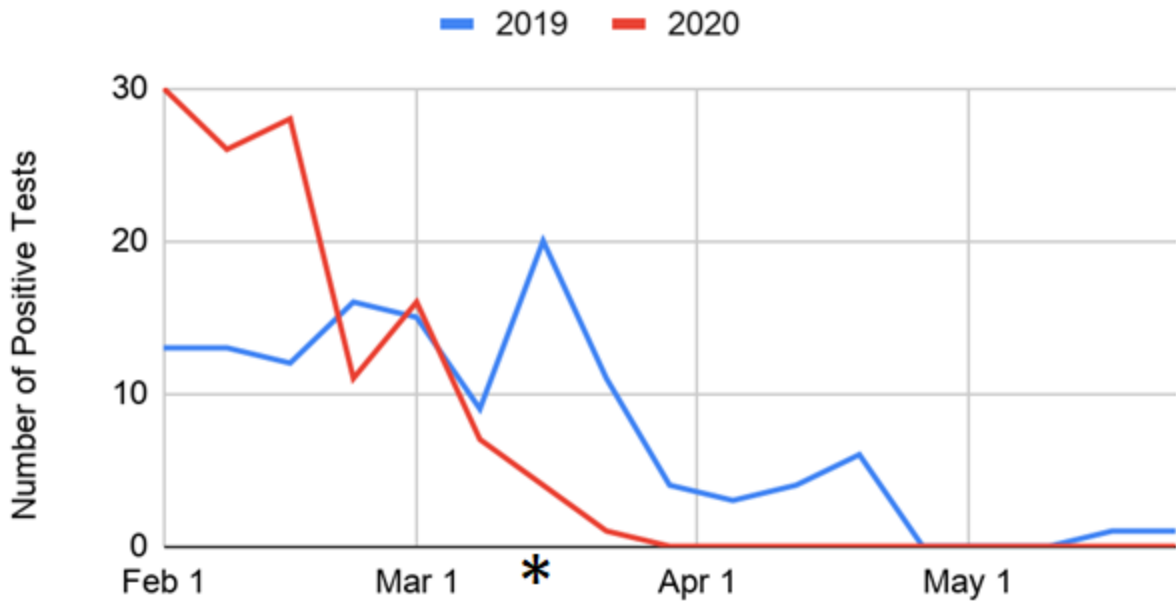

# Parainfluenza viruses 1-4

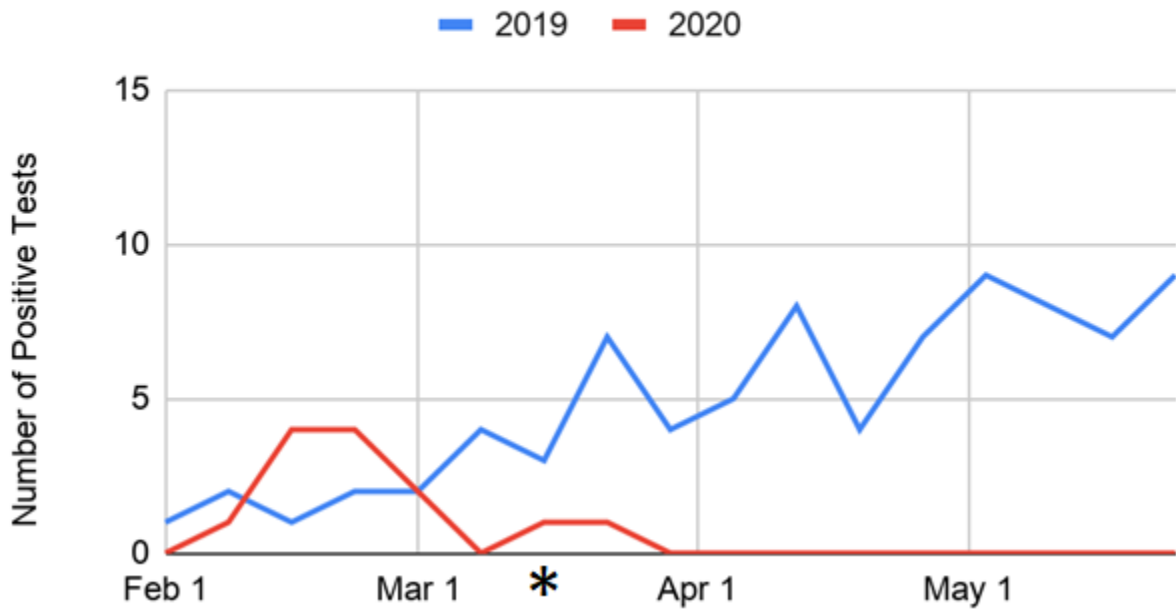

# RSV

2019 2020

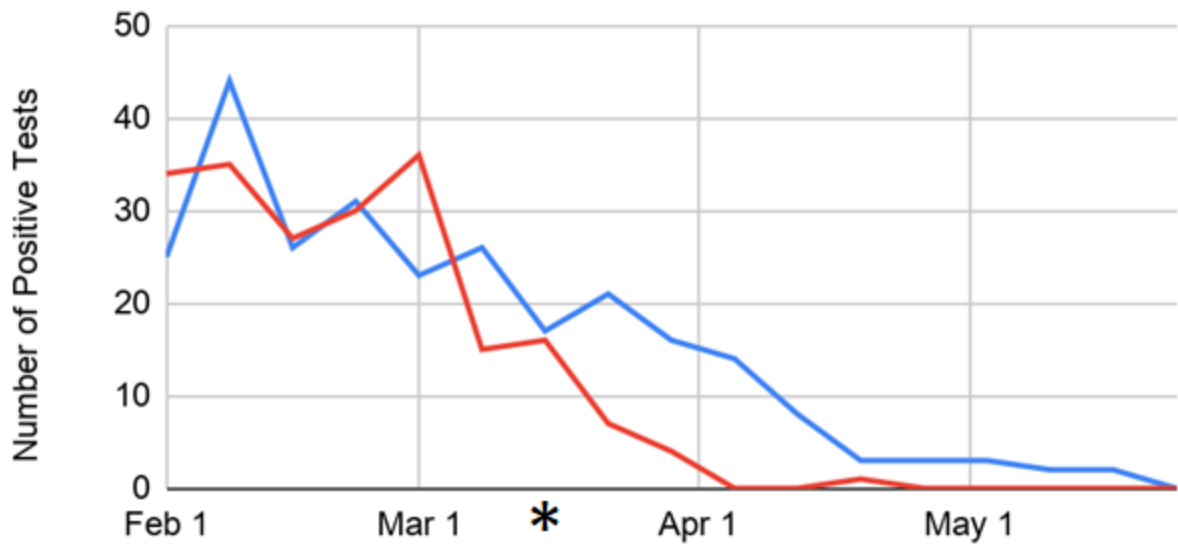

Supplement: sj-pdf-1-cpj-10.1177_00099228211044842.pdf [file sj-pdf-1-cpj-10.1177_00099228211044842.pdf]
